# Supplementary material for: AgPb10SbTe12 microrods with a rough surface grown through an in situ template route and their electrical transport properties
Source: Royal Society of Chemistry journal article supplement (doi:10.1039/c3ra40564h), 2013-01-01
Supplement: c3ra40564h.pdf [file c3ra40564h.pdf]

## Supplementary Information

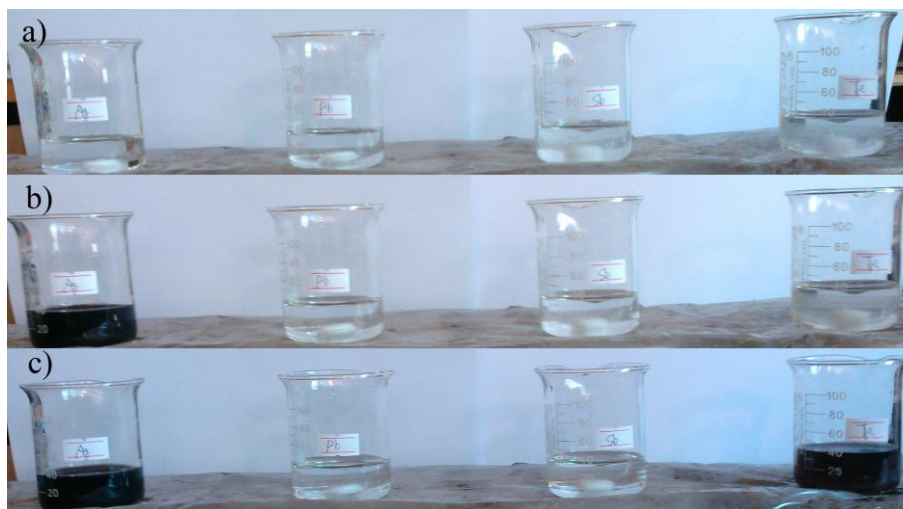

Figure S1 (a) the beakers with  $\text{AgNO}_3$ ,  $\text{Pb}(\text{CH}_3\text{COO})_2 \cdot 3\text{H}_2\text{O}$ ,  $\text{K}(\text{SbO})\text{C}_4\text{H}_4\text{O}_6 \cdot 0.5\text{H}_2\text{O}$ ,  $\text{Na}_2\text{TeO}_3$  dissolved in mixture solvents of ethylene glycol and formamide, respectively. (b) the beakers with  $\text{N}_2\text{H}_4$  added at the same time. (c) the beakers with time prolonging.

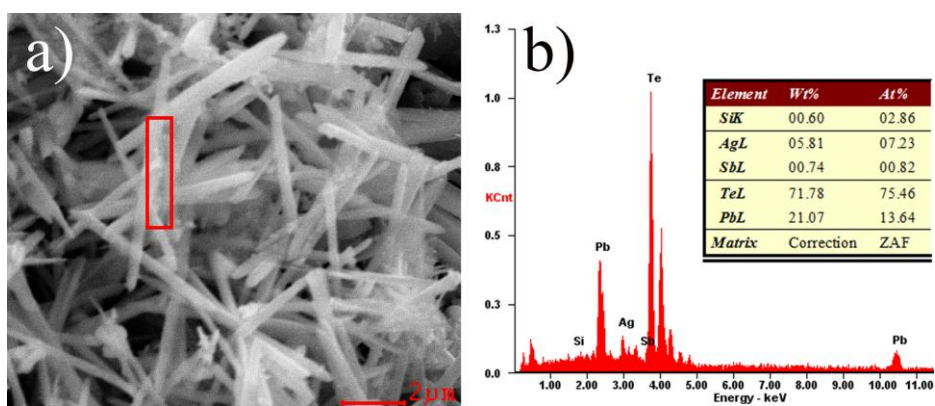

Figure S2 (a) SEM image of particles prepared for 1 h. (b) EDS spectrum of particles prepared for 1 h, the inset is the atomic ratio of each elementals.

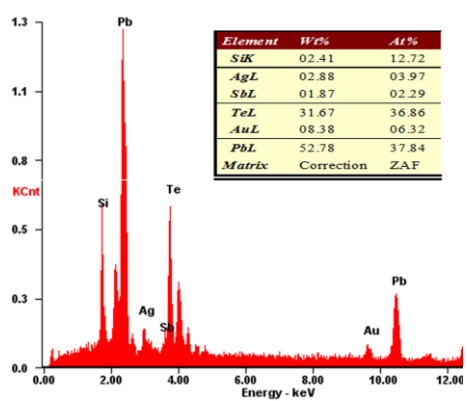

Figure S3 EDS spectrum of as-prepared  $\text{AgPb}_{10}\text{SbTe}_{12}$  rods.
